# Supplementary material for: Spin crossover metal–organic frameworks with inserted photoactive guests: on the quest to control the spin state by photoisomerization
Source: Royal Society of Chemistry journal article supplement (doi:10.1039/d1dt01057c), 2021-01-01
Supplement: d1dt01057c1.pdf [file d1dt01057c1.pdf]

## SUPPORTING INFORMATION

### **Spin Crossover Metal-Organic Frameworks with Inserted Photoactive Guests: On the Quest to Control the Spin State by Photoisomerization**

Barbora Brachňaková,<sup>a,b</sup> Ján Moncol',<sup>b</sup> Ján Pavlik,<sup>b</sup> Ivan Šalitroš,<sup>b,c,d\*</sup> Sébastien Bonhommeau,<sup>e</sup> Francisco Javier Valverde-Muñoz,<sup>f</sup> Lionel Salmon,<sup>a</sup> Gábor Molnár,<sup>a</sup> Lucie Routaboul,<sup>a</sup> Azzedine Bousseksou<sup>a\*</sup>

*a) LCC, CNRS & Université de Toulouse, 205 route de Narbonne, 31077 Toulouse, France*

*b) Department of Inorganic Chemistry. Faculty of Chemical and Food Technology. Slovak University of Technology in Bratislava. Bratislava SK-81237, Slovakia.*

*c) Department of Inorganic Chemistry. Faculty of Science, Palacký University, 17. listopadu 12, 771 46 Olomouc, Czech Republic*

*d) Central European Institute of Technology, Brno University of Technology, Purkyňova 123, 61200 Brno Czech Republic*

*e) Univ. Bordeaux, CNRS, Bordeaux INP, ISM, UMR 5255, F-33400 Talence, France*

*f) Departament de Química Inorgànica, Institut de Ciència Molecular (ICMol), Universitat de València, València, Spain.*

\* E-mail: [ivan.salitros@stuba.sk](mailto:ivan.salitros@stuba.sk), [azzedine.bousseksou@lcc-toulouse.fr](mailto:azzedine.bousseksou@lcc-toulouse.fr)

(a)

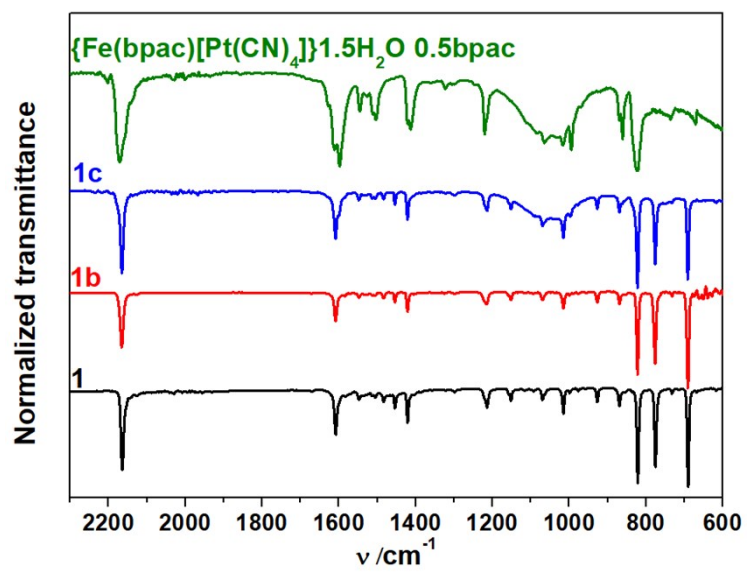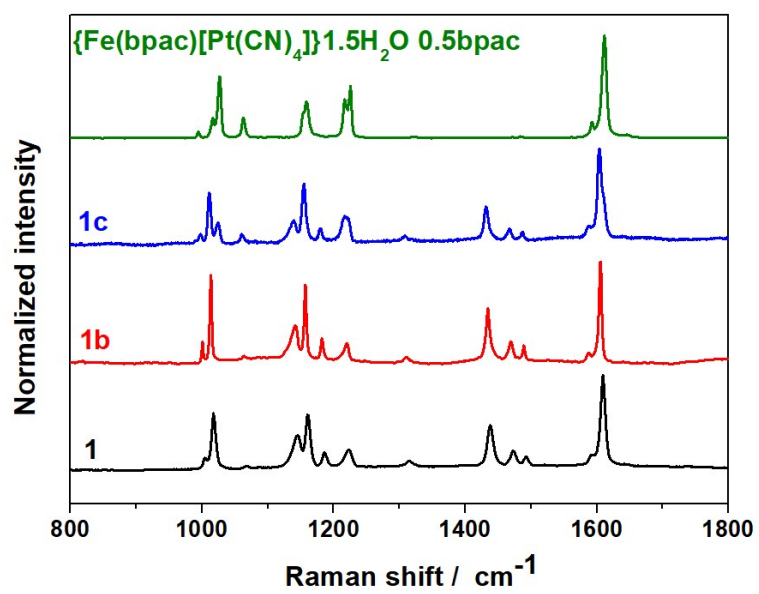

(b)

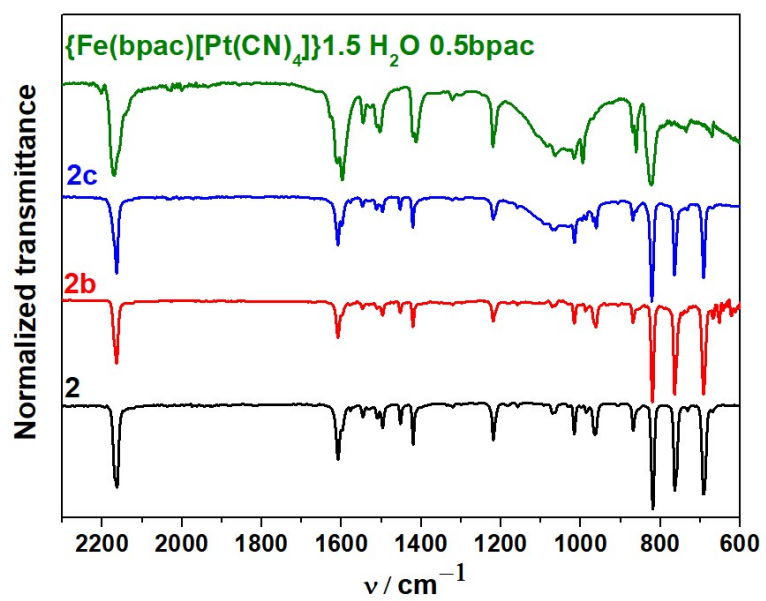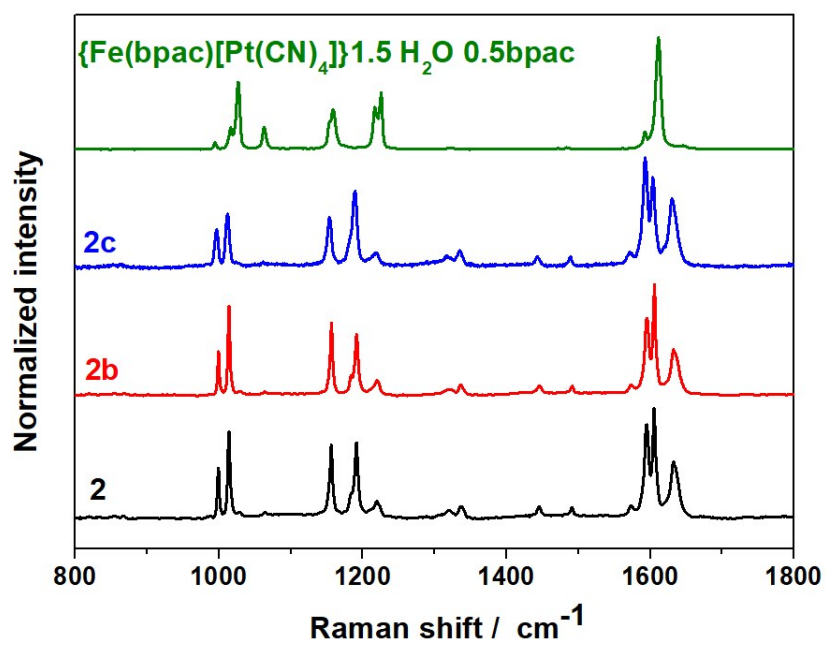

(c)

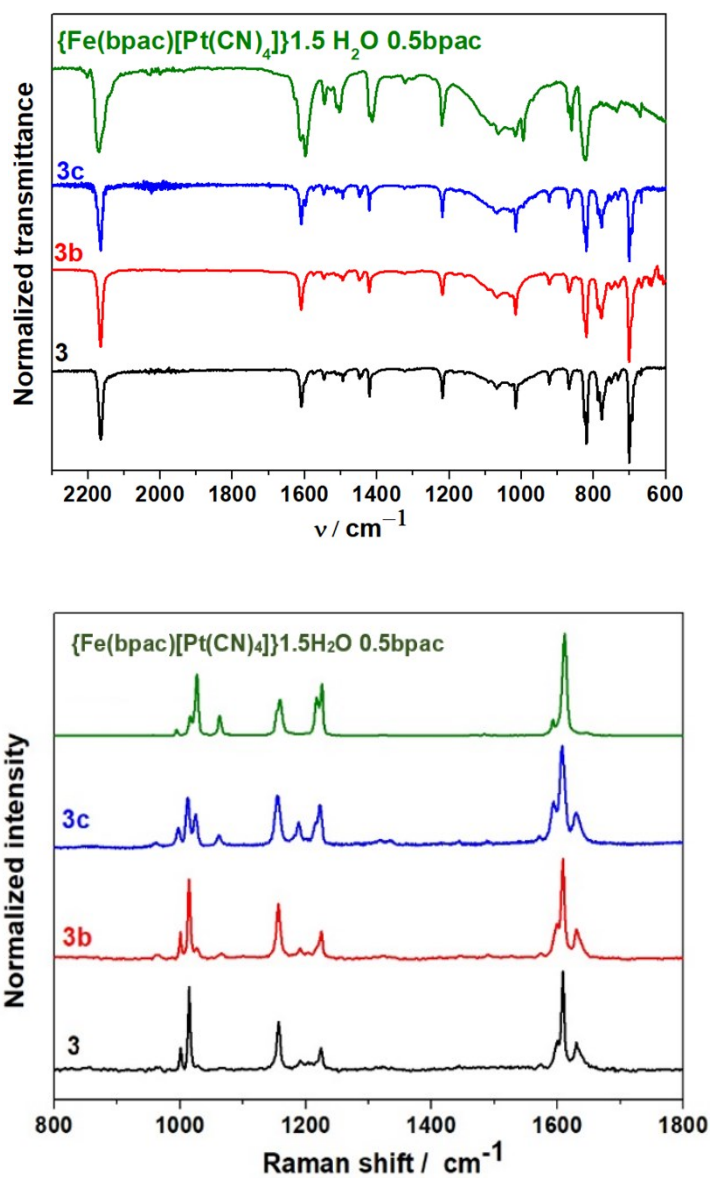

**SI-1.** Room temperature FTIR (up) and Raman (down) spectra (532 nm excitation) of the compounds **(a)** 1-1c, **(b)** 2-2c and **(c)** 3-3c compared to the spectra of  $\{\text{Fe}(\text{bpac})[\text{Pt}(\text{CN})_4]\cdot 1.5\text{H}_2\text{O}\cdot 0.5\text{bpac}$ .

**SI-3.** Experimental IR vibrational wavenumbers of compounds **1-3** compared to the host material **{Fe(bpac)[Pt(CN)<sub>4</sub>]}·1.5H<sub>2</sub>O·0.5bpac** and the pure guest compounds.

| host       | <b>1</b>        |  | <i>trans</i> azobenzene |  | <b>2</b>        |  | <i>trans</i> stilbene |  | <b>3</b>         | <i>cis</i> stilbene |                  |
|------------|-----------------|--|-------------------------|--|-----------------|--|-----------------------|--|------------------|---------------------|------------------|
| <b>Exp</b> | <b>Exp</b>      |  | <b>Exp</b>              |  | <b>Exp</b>      |  | <b>Exp</b>            |  | <b>Exp</b>       | <b>Exp</b>          |                  |
| 2170 (s)   | 2165 (s)        |  |                         |  | 2163 (s)        |  |                       |  | 2165 (s)         |                     |                  |
| 1611 (m)   | 1609 (m)        |  |                         |  | 1609 (m)        |  |                       |  | 1609 (m)         |                     |                  |
|            |                 |  |                         |  |                 |  |                       |  | 1600 (sh)        |                     | 1600 (m)         |
| 1598 (s)   |                 |  |                         |  | 1599 (sh)       |  | 1599 (w)              |  |                  |                     |                  |
|            | 1584 (vw)       |  | 1583 (vw)               |  | 1578 (vw)       |  | 1577 (vw)             |  | 1576 (vw)        |                     | 1576 (w)         |
| 1545 (w)   | 1548 (w)        |  |                         |  | 1546 (w)        |  |                       |  | 1546 (w)         |                     |                  |
| 1504 (w)   | 1506 (w)        |  |                         |  | 1510 (w)        |  |                       |  | 1512 (w)         |                     |                  |
|            | <b>1484 (w)</b> |  | <b>1483 (w)</b>         |  | <b>1497 (w)</b> |  | <b>1495 (w)</b>       |  | <b>1495 (w)</b>  |                     | <b>1495 (m)</b>  |
|            |                 |  |                         |  |                 |  |                       |  |                  |                     | <b>1490 (m)</b>  |
|            | <b>1453 (w)</b> |  | <b>1453 (w)</b>         |  | <b>1452 (w)</b> |  | <b>1451 (w)</b>       |  | <b>1448 (w)</b>  |                     | <b>1448 (m)</b>  |
|            |                 |  |                         |  |                 |  |                       |  | <b>1443 (w)</b>  |                     | <b>1443 (m)</b>  |
| 1421 (m)   | 1421 (m)        |  |                         |  | 1420 (m)        |  |                       |  | 1421 (m)         |                     |                  |
|            |                 |  |                         |  |                 |  |                       |  |                  |                     | 1406 (w)         |
| 1413 (m)   |                 |  |                         |  |                 |  |                       |  |                  |                     |                  |
| 1322 (vw)  | 1299 (vw)       |  | 1300 (w)                |  | 1321 (vw)       |  | 1331 (w)              |  |                  |                     |                  |
| 1220 (m)   |                 |  | 1222 (w)                |  |                 |  | 1299 (w)              |  |                  |                     |                  |
| 1215 (sh)  | 1214 (m)        |  |                         |  | 1219 (m)        |  | 1220 (w)              |  | 1218 (m)         |                     |                  |
|            |                 |  |                         |  |                 |  |                       |  |                  |                     | 1180 (w)         |
|            | <b>1158 (w)</b> |  | <b>1159 (w)</b>         |  | <b>1158 (w)</b> |  | <b>1155 (w)</b>       |  | <b>1156 (vw)</b> |                     | <b>1156 (vw)</b> |
| 1075 (w)   | 1070 (w)        |  | 1072 (w)                |  | 1071 (w)        |  | 1072 (w)              |  | 1067 (w)         |                     | 1074 (m)         |
| 1035 (w)   |                 |  |                         |  | 1065 (w)        |  |                       |  |                  |                     |                  |
| 1015 (w)   | 1015 (m)        |  | 1020 (w)                |  | 1016 (m)        |  | 1028 (w)              |  | 1016 (m)         |                     | 1028 (m)         |
| 995 (m)    | 999 (vw)        |  | 1000 (vw)               |  |                 |  |                       |  |                  |                     | 1000 (vw)        |
| 977 (vw)   | 977 (vw)        |  | 985 (vw)                |  | 986 (vw)        |  | 983 (w)               |  | 986 (vw)         |                     | 983 (vw)         |
|            |                 |  |                         |  | <b>963 (m)</b>  |  | <b>961 (m)</b>        |  |                  |                     | 965 (vw)         |
| 869 (w)    | <b>927 (w)</b>  |  | <b>927 (w)</b>          |  | 907 (vw)        |  | 909 (w)               |  | <b>922 (w)</b>   |                     | 923 (m)          |
| 861 (m)    | 866 (w)         |  | 866 (w)                 |  | 868 (w)         |  | 868 (w)               |  | 868 (w)          |                     | 862 (m)          |
| 822 (s)    | 822 (s)         |  |                         |  | 819 (s)         |  |                       |  | 825 (m)          |                     |                  |
|            |                 |  |                         |  |                 |  |                       |  | 820 (s)          |                     |                  |
| 776 (s)    | 776 (s)         |  | 775 (s)                 |  | 764 (s)         |  | 762 (s)               |  | <b>777 (m)</b>   |                     | 778 (s)          |
|            |                 |  |                         |  |                 |  |                       |  | <b>751 (w)</b>   |                     | 751 (m)          |
| 738 (vw)   | 732 (vw)        |  |                         |  | 732 (vw)        |  |                       |  | 732 (vw)         |                     | 732 (w)          |
|            |                 |  |                         |  |                 |  |                       |  | 701 (s)          |                     |                  |
|            | 691 (s)         |  | 688 (s)                 |  | 691 (s)         |  | 690 (s)               |  | 693 (m)          |                     | 693 (s)          |
| 671 (vw)   |                 |  |                         |  |                 |  |                       |  |                  |                     |                  |

**SI-2.** Thermogravimetric curves of the powder samples.

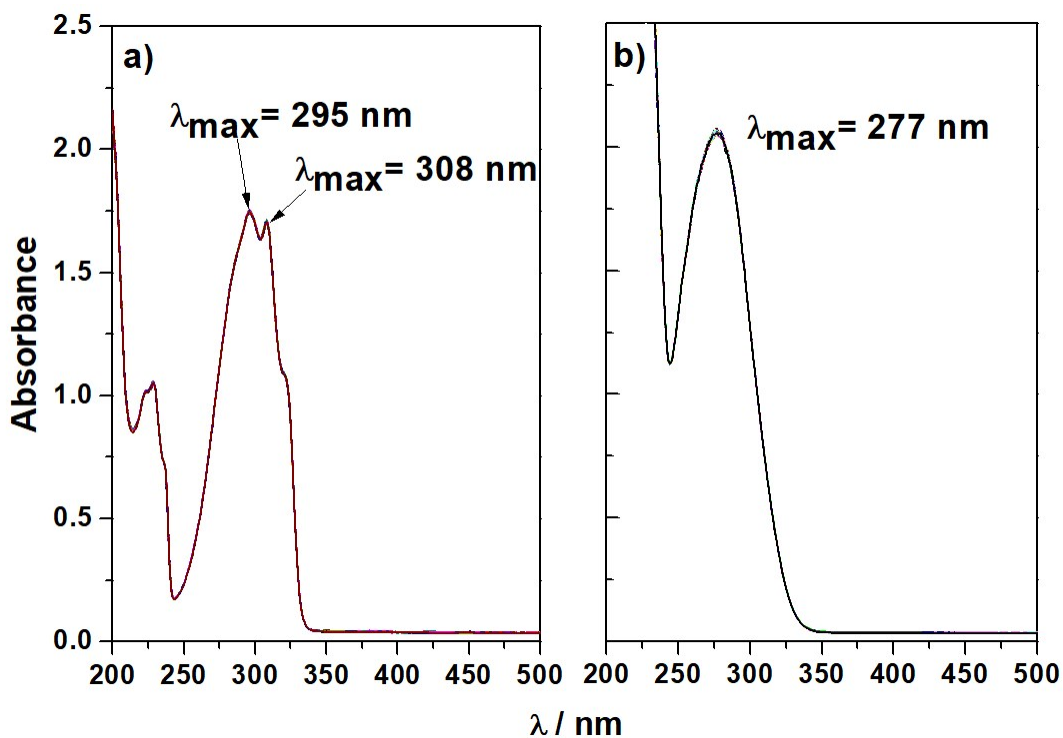

SI-4. UV-VIS absorption spectra collected every minute over 2 hours of a water-ethanol solution of (a) *trans*-stilbene and (b) *cis*-stilbene under ambient light.

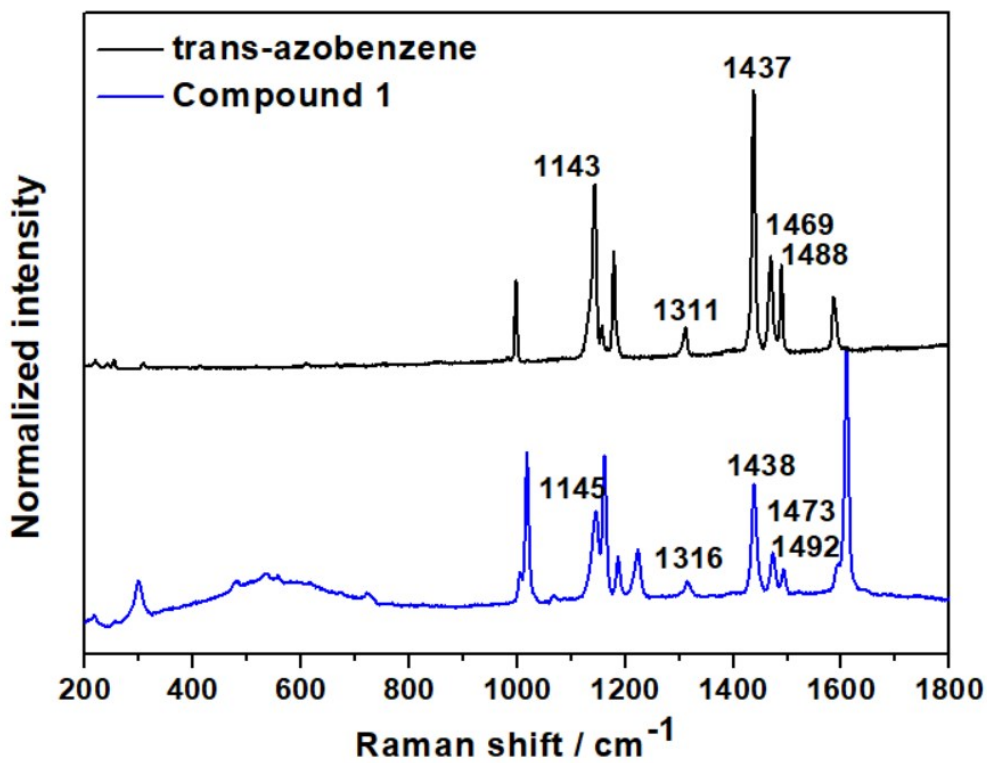

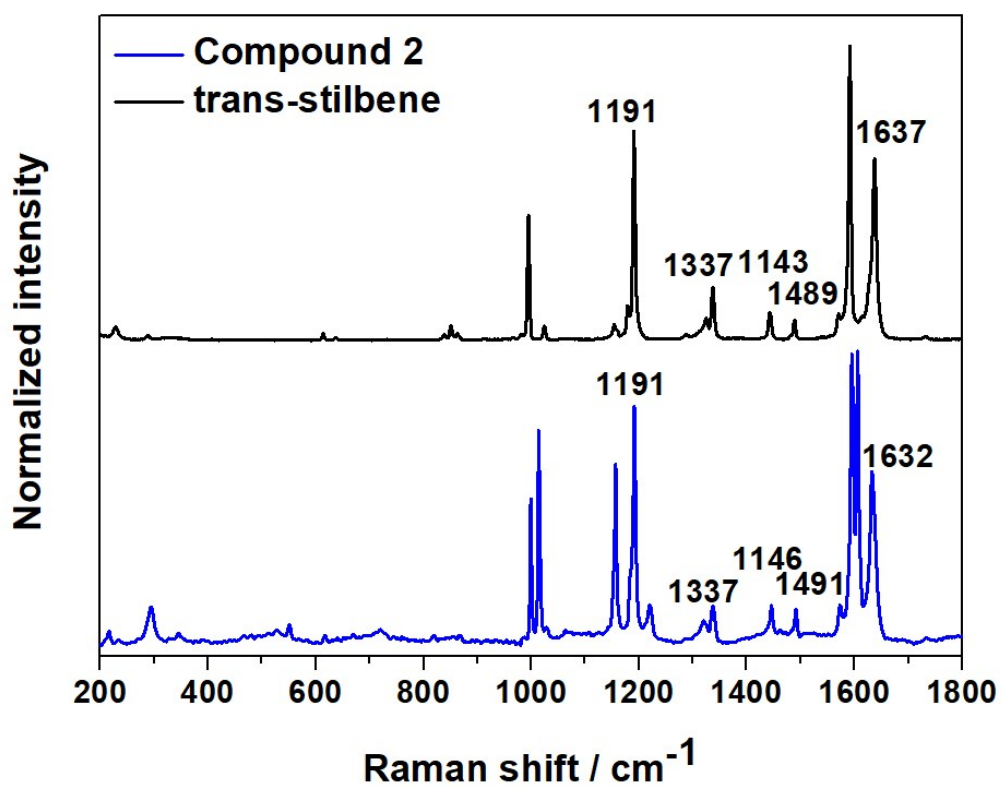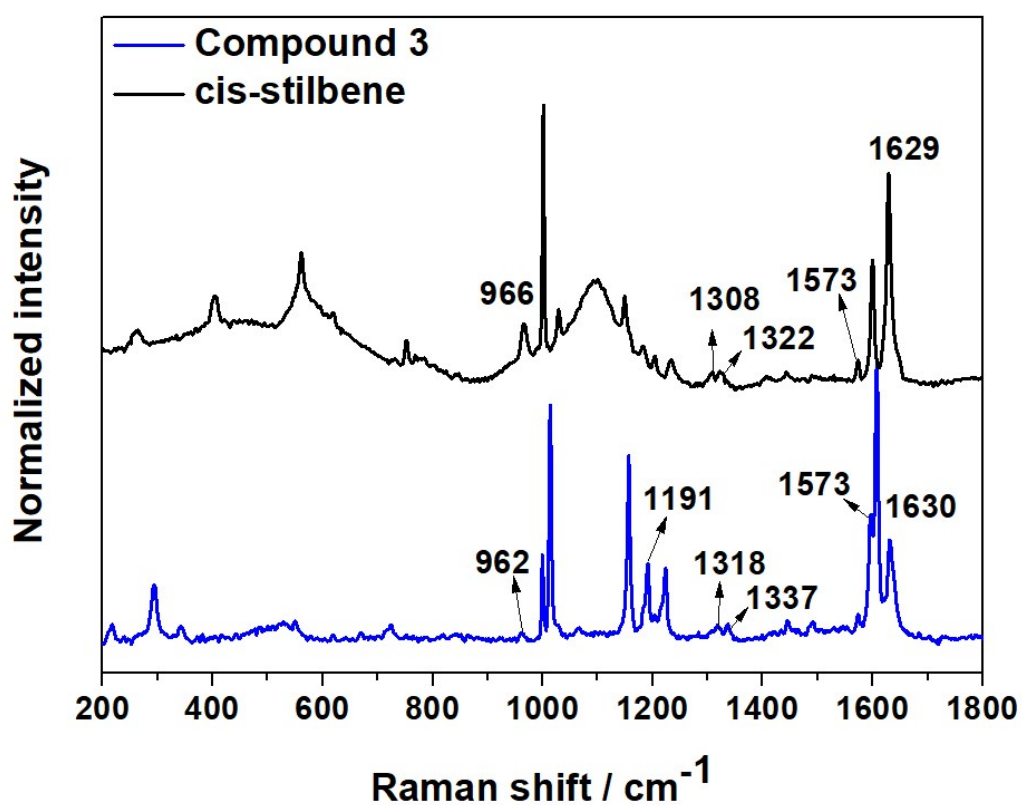

SI-5. Raman spectral fingerprints (532 nm excitation) of guest molecules in compounds 1-3.

**SI-6.** Well-distinguishable peaks present in the room-temperature Raman of host {Fe(bpac)[Pt(CN)<sub>4</sub>]}·1.5H<sub>2</sub>O·0.5bpac and compounds **1-3** measured by different laser sources.

| host material |      | 1    |      | 2    |      |      | 3      |      |      |
|---------------|------|------|------|------|------|------|--------|------|------|
| 532           | 785  | 355  | 532  | 355  | 532  | 785  | 355    | 532  | 785  |
|               |      |      |      | 1633 | 1632 | 1632 | 1631   | 1630 | 1628 |
| 1612          | 1611 | 1606 | 1609 | 1596 | 1606 | 1604 |        | 1607 | 1607 |
| 1592          | 1592 | 1592 | 1594 |      | 1595 | 1593 | 1596   | 1597 | 1597 |
|               |      | 1587 |      | 1573 | 1573 | 1574 | 1573   | 1573 | 1571 |
| 1483          | 1484 | 1489 | 1492 | 1491 | 1491 | 1490 | 1491   | 1491 | 1494 |
|               |      | 1468 | 1473 | 1445 | 1446 | 1445 | 1447/5 | 1445 | 1441 |
|               |      | 1433 | 1438 | 1336 | 1337 | 1336 | 1336   | 1337 |      |
|               |      |      | 1316 | 1317 | 1314 | 1320 | 1317   | 1318 | 1320 |
|               |      | 1308 |      | 1300 |      |      | 1300   |      | 1304 |
| 1226          | 1224 |      | 1223 |      | 1220 | 1219 |        | 1223 | 1223 |
| 1217          | 1217 |      |      |      |      |      |        | 1203 | 1203 |
|               |      | 1182 | 1186 | 1189 | 1191 | 1190 | 1189   | 1191 | 1189 |
|               |      |      |      | 1184 |      |      | 1182   |      |      |
| 1159          | 1159 |      | 1162 | 1156 | 1157 | 1155 | 1153   | 1156 | 1156 |
| 1154          | 1154 | 1142 | 1145 |      |      |      |        |      |      |
| 1062          | 1064 |      | 1068 |      | 1063 |      |        | 1066 | 1068 |
| 1027          | 1028 |      |      |      | 1029 | 1029 |        |      | 1030 |
| 1016          | 1017 |      | 1017 |      | 1014 | 1014 |        | 1014 | 1014 |
| 994           | 995  | 999  | 1004 | 997  | 999  | 999  | 997    | 1000 | 1000 |
|               |      | 985  |      |      |      |      |        | 959  | 961  |
|               |      |      |      |      |      | 868  |        |      | 867  |
|               |      |      |      |      |      | 855  |        |      |      |
|               |      |      |      |      |      | 819  |        |      | 818  |
|               |      |      |      |      |      |      |        |      | 770  |
| 730           | 733  | 755  | 721  |      |      | 727  | 755    | 724  | 752  |
|               |      |      |      |      |      |      |        |      | 727  |
|               | 670  |      |      |      | 671  | 670  |        | 669  | 668  |
|               |      |      |      | 640  |      | 640  | 643    |      |      |
|               |      |      |      | 615  | 617  | 617  | 615    | 618  | 619  |
| 559           | 553  |      | 557  |      | 551  | 550  |        | 551  | 550  |
|               |      |      | 533  |      |      |      |        |      |      |
|               | 381  |      | 480  |      |      | 468  |        |      | 406  |
| 320           | 326  |      |      |      |      | 341  |        | 342  | 343  |
|               |      | 274  | 299  | 286  | 294  | 294  |        | 293  | 294  |
|               |      | 222  |      |      |      |      |        |      | 263  |
|               |      |      | 216  | 208  | 216  | 219  | 206    | 217  | 218  |



(a)

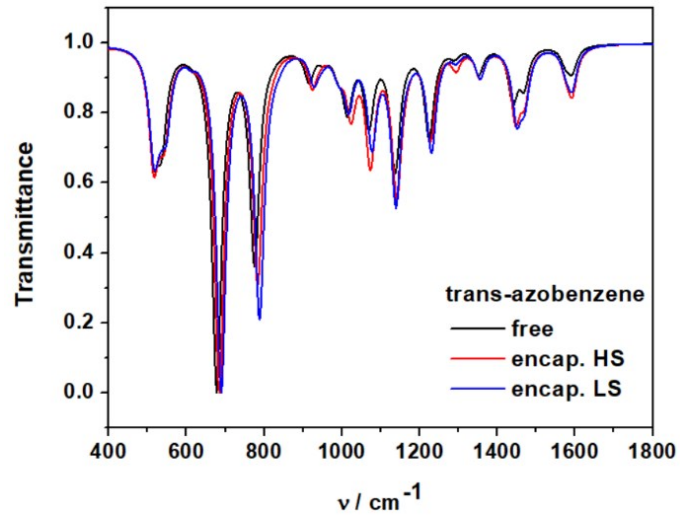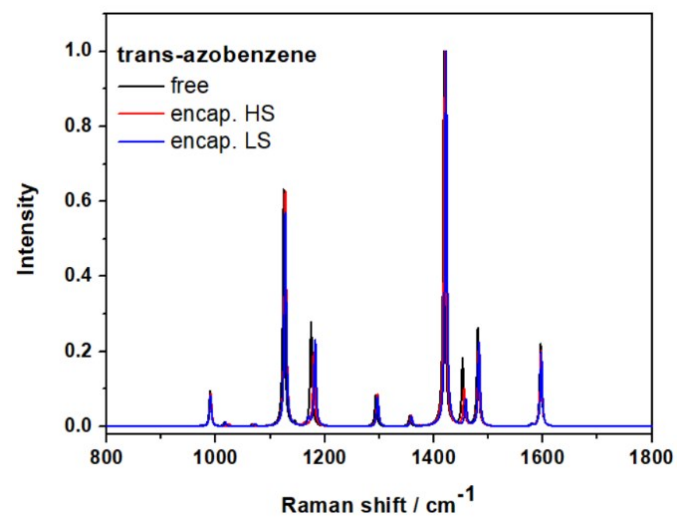

(b)

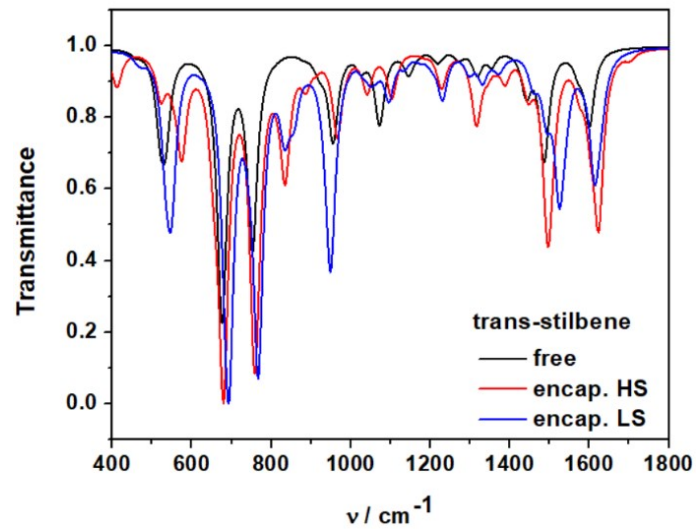

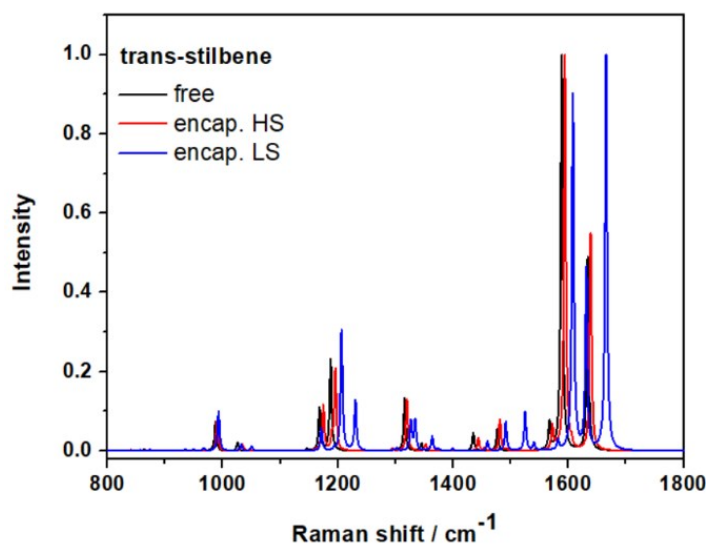

(c)

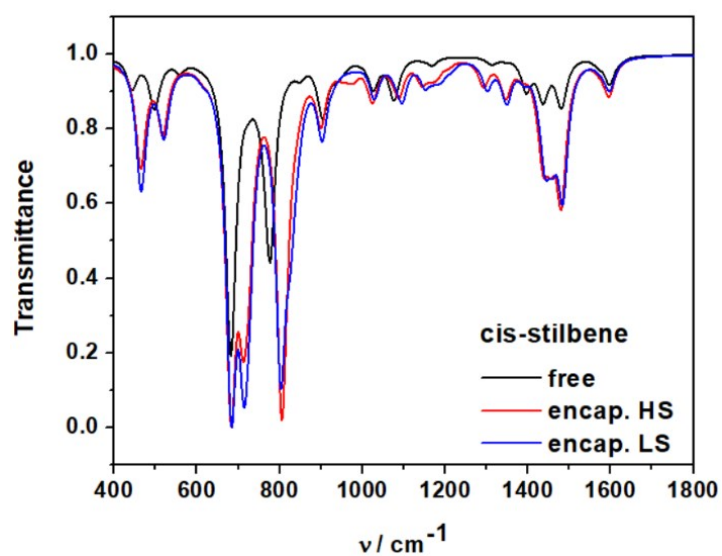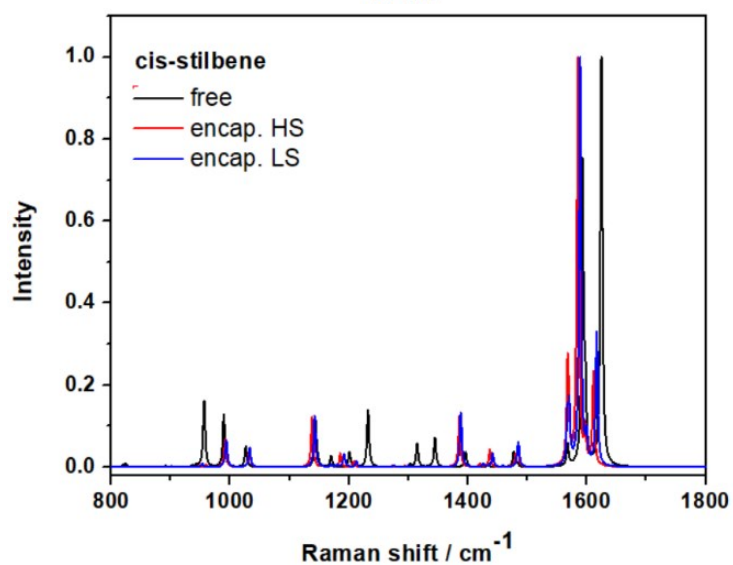

**SI-7.** Calculated FTIR (up) and Raman (down) spectra of free and encapsulated **(a)** *trans*-azobenzene, **(b)** *trans*-stilbene and **(c)** *cis*-stilbene.

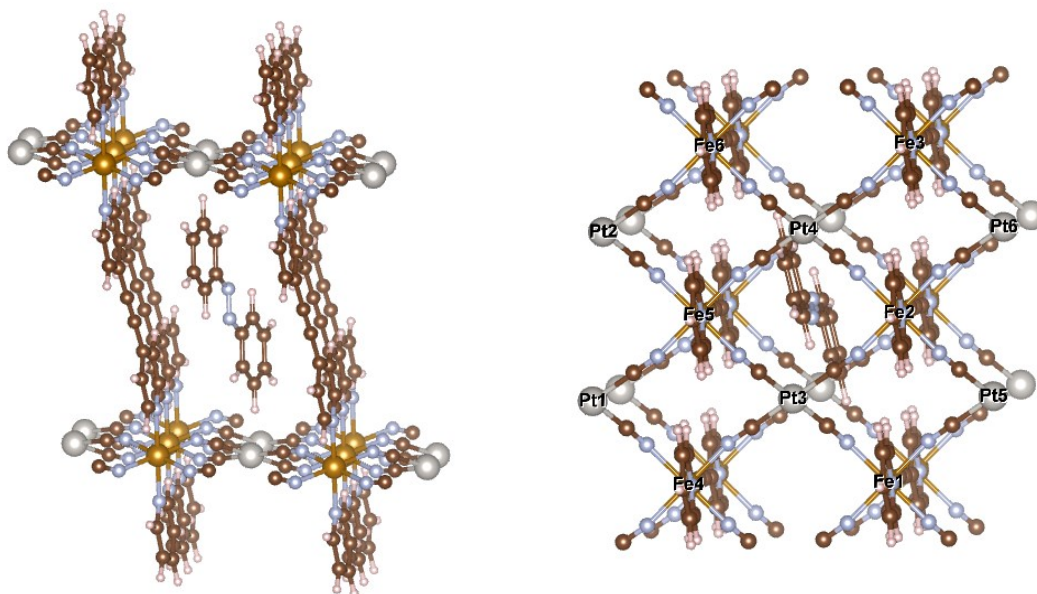

**SI-8.** The model of cavity and encapsulated molecule as it was used in the QM/MM calculations. Shown is the case of MOF in HS state with *trans*-azobenzene, view perpendicular on the guest molecule (left) and parallel with the guest molecule with displayed also labels of atoms (right).

**SI-9.** Values of calculated CHELPG charges on metallic centers of the model cavity. The labelling of atoms is shown in Fig. SI-8.

|            | <b>LS state</b> | <b>HS state</b> |
|------------|-----------------|-----------------|
| <b>Pt1</b> | 0.56            | 0.46            |
| <b>Pt2</b> | 0.55            | 0.46            |
| <b>Pt3</b> | 0.12            | -0.21           |
| <b>Pt4</b> | 0.11            | -0.21           |
| <b>Pt5</b> | 0.55            | 0.44            |
| <b>Pt6</b> | 0.55            | 0.44            |
| <b>Fe1</b> | -2.32           | -0.21           |
| <b>Fe2</b> | -2.15           | 0.11            |
| <b>Fe3</b> | -2.20           | -0.14           |
| <b>Fe4</b> | -2.22           | -0.17           |
| <b>Fe5</b> | -2.27           | -0.06           |
| <b>Fe6</b> | -2.45           | -0.22           |

| <b>SI-10. FTIR peaks of guest molecules before and after encapsulation. The calculated data are compared with the experiment (at 293 K).</b> |          |          |              |          |                              |          |          |              |          |                            |          |          |              |          |
|----------------------------------------------------------------------------------------------------------------------------------------------|----------|----------|--------------|----------|------------------------------|----------|----------|--------------|----------|----------------------------|----------|----------|--------------|----------|
| <b><i>trans</i>-azobenzene</b>                                                                                                               |          |          |              |          | <b><i>trans</i>-stilbene</b> |          |          |              |          | <b><i>cis</i>-stilbene</b> |          |          |              |          |
| calculated                                                                                                                                   |          |          | experimental |          | calculated                   |          |          | experimental |          | calculated                 |          |          | experimental |          |
| free                                                                                                                                         | encap HS | encap LS | free         | encap HS | free                         | encap HS | encap LS | free         | encap HS | free                       | encap HS | encap LS | free         | encap HS |
| 1590                                                                                                                                         | 1591     | 1591     | 1583         | 1584     | 1600                         | 1623     | 1616     | 1597         | 1598     | 1597                       | 1595     | 1597     | 1600         | 1600     |
| 1466                                                                                                                                         | 1466     | 1466     | 1483         | 1483     | 1487                         | 1496     | 1525     | 1577         | 1578     | 1480                       | 1479     | 1482     | 1576         | 1576     |
| 1440                                                                                                                                         | 1448     | 1451     | 1453         | 1454     | 1441                         | 1447     | 1495     | 1495         | 1497     | 1437                       | 1439     | 1445     | 1495         | 1495     |
| 1352                                                                                                                                         |          |          |              |          |                              |          | 1461     | 1451         | 1452     |                            |          |          | 1448         | 1448     |
| 1334                                                                                                                                         | 1355     | 1356     |              |          | 1351                         | 1387     | 1371     |              |          | 1397                       |          |          | 1443         | 1443     |
|                                                                                                                                              |          |          |              |          | 1318                         | 1316     | 1331     | 1331         |          |                            | 1347     | 1349     | 1406         |          |
| 1288                                                                                                                                         | 1294     | 1292     | 1300         | 1299     |                              |          | 1298     | 1300         |          |                            | 1293     | 1301     | 1203         | 1204     |
| 1224                                                                                                                                         | 1228     | 1230     | 1222         | 1214     | 1217                         | 1228     | 1230     | 1219         | 1219     |                            |          |          | 1180         |          |
|                                                                                                                                              |          |          | 1159         | 1158     | 1146                         | 1178     |          | 1182         | 1182     |                            |          |          |              |          |
| 1137                                                                                                                                         | 1141     | 1139     | 1151         | 1151     | 1146                         | 1103     |          | 1155         | 1158     | 1168                       | 1145     | 1152     | 1156         | 1156     |
| 1070                                                                                                                                         | 1073     | 1077     | 1072         | 1070     | 1075                         | 1103     |          | 1105         |          | 1075                       | 1086     | 1094     | 1106         |          |
|                                                                                                                                              |          |          |              |          |                              |          | 1094     | 1072         | 1071     | 1075                       | 1086     | 1094     | 1074         |          |
|                                                                                                                                              |          |          |              |          |                              | 1041     | 1051     |              |          |                            |          |          |              |          |
| 1014                                                                                                                                         | 1023     | 1017     | 1020         |          | 1027                         |          |          | 1028         | 1031     | 1026                       | 1025     | 1029     | 1028         |          |
| 1022                                                                                                                                         |          |          | 1000         | 999      |                              |          |          | 983          | 986      |                            |          |          | 1001         | 986      |
|                                                                                                                                              | 993(sh)  | 992(sh)  | 985          | 987      | 956                          | 966      | 949      | 961          | 964      |                            |          |          | 982          |          |
| 915                                                                                                                                          | 924      | 931      | 927          | 927      |                              | 886      |          |              |          |                            |          |          | 965          | 923      |
|                                                                                                                                              |          |          |              |          |                              |          |          | 909          | 907      |                            |          |          | 923          |          |
|                                                                                                                                              |          |          |              |          |                              |          |          | 847          |          | 905                        | 900      | 904      |              |          |
| 775                                                                                                                                          | 783      | 788      | 775          | 776      |                              |          | 832      | 836          |          |                            |          |          | 862          |          |
|                                                                                                                                              |          |          |              |          |                              |          | 759      |              |          |                            |          |          | 844          |          |
|                                                                                                                                              |          |          |              |          | 752                          |          |          |              |          |                            | 805      | 804      |              | 777      |
| 678                                                                                                                                          | 684      | 689      | 688          | 691      |                              |          | 767      | 762          | 764      | 777                        |          |          | 778          | 752      |
|                                                                                                                                              |          |          |              |          | 676                          | 680      | 692      |              |          |                            |          |          | 751          | 732      |
|                                                                                                                                              |          |          |              |          |                              |          |          |              |          |                            |          |          | 732          |          |
| 532(sh)                                                                                                                                      | 539 (sh) | 545(sh)  |              |          |                              |          |          | 690          | 691      | 713                        | 713      | 715      |              | 694      |
| 517                                                                                                                                          | 517      | 519      |              |          |                              |          |          |              |          | 682                        | 684      | 684      | 692          |          |
|                                                                                                                                              |          |          |              |          | 528                          | 575      | 544      | 540          | 535      |                            |          |          |              |          |
|                                                                                                                                              |          |          |              |          |                              | 525      |          |              |          |                            |          |          |              |          |

**SI 11.** Raman peaks of guest molecules before and after encapsulation. The calculated data are compared with the experiment.

| <i>trans-azobenzene</i> |             |             |              |             |             | <i>trans-stilbene</i> |             |             |              |             |             | <i>cis-stilbene</i> |             |             |              |             |             |
|-------------------------|-------------|-------------|--------------|-------------|-------------|-----------------------|-------------|-------------|--------------|-------------|-------------|---------------------|-------------|-------------|--------------|-------------|-------------|
| calculated              |             |             | experimental |             |             | calculated            |             |             | experimental |             |             | calculated          |             |             | experimental |             |             |
| free                    | encap<br>HS | encap<br>LS | free         | encap<br>HS | encap<br>LS | free                  | encap<br>HS | encap<br>LS | free         | encap<br>HS | encap<br>LS | free                | encap<br>HS | encap<br>LS | free         | encap<br>HS | encap<br>LS |
| 1596                    | 1596        | 1597        | 1585         |             |             | 1634                  | 1638        | 1665        | 1637         | 1632        | 1635        | 1624                | 1611        | 1616        | 1629         | 1630        | 1632        |
|                         |             |             |              | 1487        | 1495        | 1588                  | 1594        | 1608        | 1591         | 1595        | 1598        | 1593                | 1597        | 1599        | 1599         | 1597        |             |
|                         |             |             |              | 1467        | 1474        | 1567                  | 1572        | 1582        |              |             |             |                     | 1568        | 1570        | 1491         | 1491        |             |
| 1481                    | 1482        | 1483        | 1489         | 1432        | 1438        |                       |             | 1540        |              |             |             | 1477                | 1483        | 1485        | 1444         | 1445        |             |
| 1453                    | 1455        | 1459        | 1469         | 1310        | 1316        | 1477                  | 1481        | 1491        | 1489         | 1491        | 1492        | 1434                | 1437        | 1441        |              |             |             |
| 1355                    | 1420        |             | 1438         |             |             | 1435                  | 1443        | 1459        | 1443         | 1446        |             | 1396                | 1385        | 1424        |              |             |             |
|                         | 1358        | 1359        | 1311         |             |             |                       |             |             |              |             |             | 1334                |             | 1388        | 1321         | 1337        |             |
| 1293                    | 1297        | 1297        |              |             |             |                       |             |             |              |             |             | 1315                |             |             | 1308         |             |             |
|                         |             |             |              |             |             | 1345                  | 1352        | 1364        | 1337         | 1337        | 1339        | 1232                |             |             | 1234         | 1223        | 1223        |
|                         |             |             |              |             |             | 1316                  | 1320        | 1334        | 1325         | 1320        |             | 1201                | 1208        | 1213        | 1204         | 1203        |             |
|                         |             | 1182        |              | 1180        | 1189        |                       |             | 1327        |              |             |             | 1170                | 1185        | 1192        |              | 1191        | 1196        |
| 1175                    | 1179        | 1170        | 1179         |             |             |                       |             | 1302        | 1289         |             |             |                     |             |             |              |             |             |
|                         |             |             | 1157         |             |             |                       |             | 1230        |              |             |             | 1143                | 1138        | 1142        | 1149         | 1156        | 1158        |
| 1145                    |             |             | 1143         | 1139        | 1149        | 1187                  | 1195        | 1206        | 1191         | 1191        | 1193        |                     |             |             | 1100         |             |             |
|                         | 1128        | 1128        |              |             |             | 1168                  | 1175        | 1171        | 1179         |             |             | 1026                | 1032        | 1033        | 1029         |             |             |
| 1124                    |             |             |              |             |             |                       |             | 1050        | 1154         |             |             |                     |             |             |              |             |             |
|                         |             |             |              |             |             | 1025                  | 1033        | 1032        | 1024         |             |             |                     |             |             |              |             |             |
|                         |             |             |              |             |             | 987                   | 990         | 993         | 995          | 999         | 999         | 989                 | 991         | 994         | 1001         | 1000        |             |
| 1066                    |             | 1072        | 998          |             |             |                       |             | 967         | 981          |             |             | 956                 | 959         | 953         | 966          | 959         |             |
| 1015                    | 991         | 1018        |              |             |             |                       |             | 949         |              |             |             |                     | 947         |             |              |             |             |
| 989                     |             | 990         |              |             |             |                       |             | 863         | 865          | 874         | 863         | 891                 |             | 901         |              |             |             |
| 914                     | 663         |             | 608          |             |             | 839                   | 841         | 857         | 851          |             |             | 850                 | 845         | 845         |              |             |             |
| 663                     | 606         | 605         |              |             |             |                       |             |             | 839          |             |             | 824                 |             |             |              |             |             |
| 605                     |             |             |              |             |             |                       |             |             |              |             |             |                     |             |             |              |             |             |
|                         |             |             |              |             |             |                       |             |             |              |             |             | 777                 | 774         | 774         |              |             |             |
|                         |             |             |              |             |             |                       |             |             |              |             |             | 763                 |             |             | 752          |             |             |
|                         |             |             |              |             |             | 638                   | 636         | 643         | 638          |             |             | 745                 | 737         | 738         |              |             |             |
|                         |             |             |              |             |             | 611                   | 613         | 614         | 614          |             |             | 724                 |             |             |              |             |             |
|                         |             |             |              |             |             |                       |             |             |              |             |             | 612                 | 618         | 618         | 619          |             |             |

**SI-12.** Selected crystallographic information for crystal structures of compound **1**.

|                                                      | 1@100 K                                             | 1@180 K                                             |
|------------------------------------------------------|-----------------------------------------------------|-----------------------------------------------------|
| Formula                                              | C <sub>28</sub> H <sub>18</sub> FeN <sub>8</sub> Pt | C <sub>28</sub> H <sub>18</sub> FeN <sub>8</sub> Pt |
| <i>M<sub>w</sub></i> / g mol <sup>-1</sup>           | 717.44                                              | 717.44                                              |
| Crystal colour                                       | red                                                 | red                                                 |
| Temperature / K                                      | 100(1)                                              | 180(1)                                              |
| Wavelength / Å                                       | 1.54186                                             | 1.54186                                             |
| Crystal system                                       | triclinic                                           | triclinic                                           |
| Space group                                          | P-1                                                 | P-1                                                 |
| <i>a</i> / Å                                         | 6.8681(2)                                           | 6.9483(3)                                           |
| <i>b</i> / Å                                         | 7.3161(2)                                           | 7.5509(3)                                           |
| <i>c</i> / Å                                         | 13.4430(5)                                          | 13.0859(5)                                          |
| $\alpha$ / °                                         | 79.253(3)                                           | 77.715(3)                                           |
| $\beta$ / °                                          | 76.780(3)                                           | 82.604(3)                                           |
| $\gamma$ / °                                         | 89.413(3)                                           | 88.873(3)                                           |
| <i>V</i> / Å <sup>3</sup>                            | 645.67(4)                                           | 665.24(5)                                           |
| <i>Z</i> ; $\rho_{\text{calc}}$ / g.cm <sup>-3</sup> | 1, 1.222                                            | 1, 1.222                                            |
| $\mu$ (Cu-K $\alpha$ )/mm <sup>-1</sup>              | 14.762                                              | 14.328                                              |
| <i>F</i> (000)                                       | 346                                                 | 346                                                 |
| Crystal size / mm                                    | 0.18x0.13x0.05                                      | 0.12x0.08x0.06                                      |
| $\theta$ range for the data collection / °           | 2.92 to 69.76                                       | 3.485 to 71.795                                     |
| Final <i>R</i> indices                               | <i>R</i> <sub>1</sub> = 0.0493                      | <i>R</i> <sub>1</sub> = 0.0745                      |
| [ <i>I</i> > 2 $\sigma$ ( <i>I</i> )] <sup>a</sup>   | w <i>R</i> <sub>2</sub> = 0.1252                    | w <i>R</i> <sub>2</sub> = 0.1940                    |
| <i>R</i> indices (all data) <sup>a</sup>             | <i>R</i> <sub>1</sub> = 0.0494                      | <i>R</i> <sub>1</sub> = 0.0750                      |
| GoF on <i>F</i> <sup>2</sup>                         | 1.069                                               | 1.070                                               |
| CCDC number                                          | 2042716                                             | 2042717                                             |

$$^a R_1 = \sum(F_0 - F_c) / \sum(F_0); wR_2 = \sqrt{\sum[w(F_0^2 - F_c^2)^2] / \sum[w(F_0^2)^2]}$$

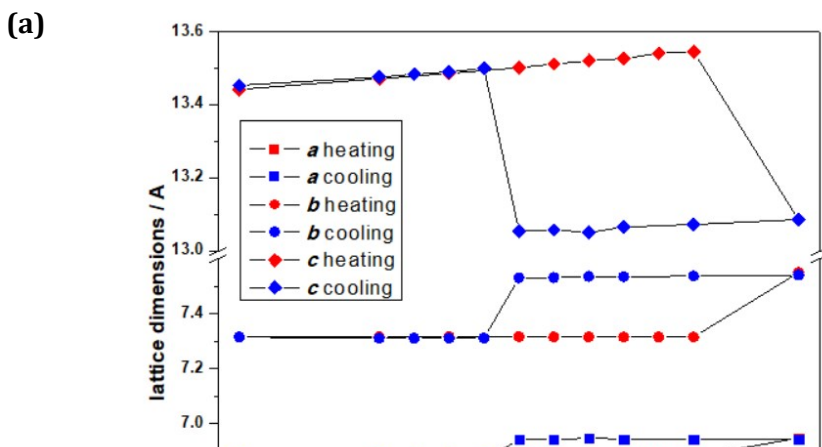

(b)

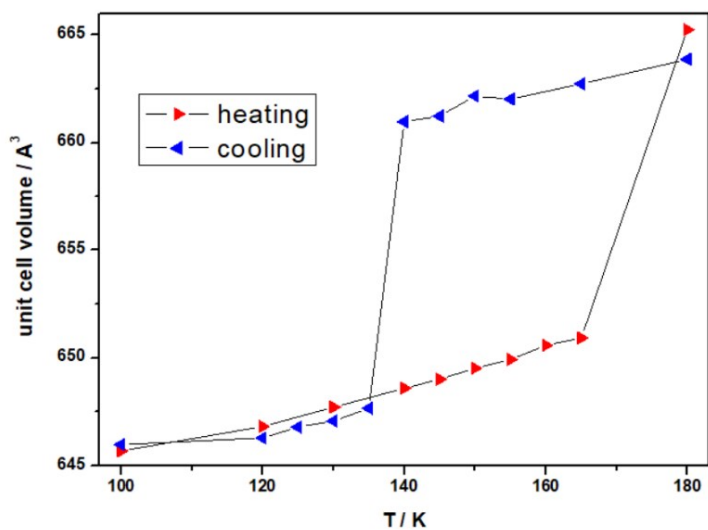

SI-13. Temperature evolution of (a) unit cell constants and (b) unit cell volume in the crystal structure of compound **1**.

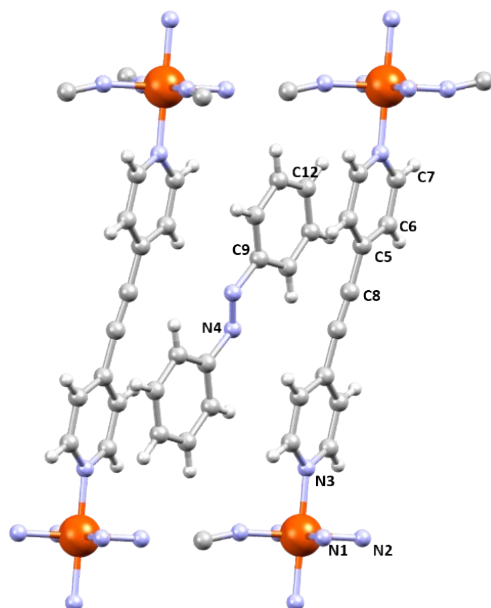

SI-14. Fe-N distances and non-covalent contacts between the **bpac** bridging ligands and guest *trans*-azobenzene molecule in the crystal structure **1** at

100 K: Fe-N1 = 1.926(6) Å, Fe-N2 = 1.926(6) Å, Fe-N3 2.008(5) Å, N4...C8 = 3.630(11) Å, C9...C5 = 3.694(11) Å, C9...C6 = 3.635(11) Å, C12...C7 = 3.525(11) Å; and at 180 K: Fe-N1 = 2.137(8) Å, Fe-N2 = 2.153(8) Å, Fe-N3 = 2.217(9) Å, N4...C8 = 3.740(11) Å, C9...C5 = 3.806(11) Å, C9...C6 = 3.552(11) Å, C12...C7 = 3.606(11) Å.

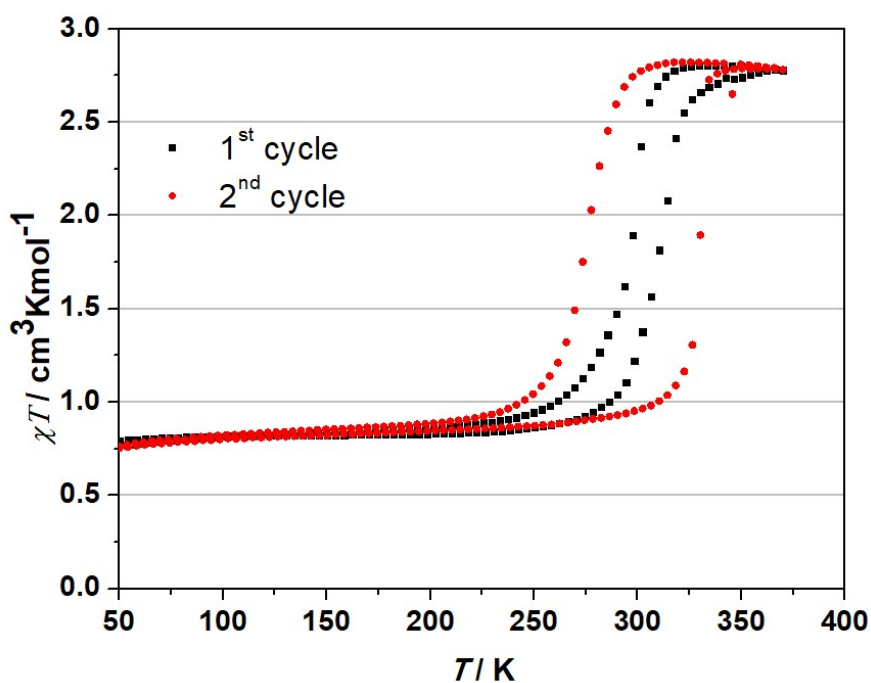

**SI-15.** Magnetic properties of the host system  $\{\text{Fe}(\text{bpac})[\text{Pt}(\text{CN})_4]\} \cdot 1.5\text{H}_2\text{O} \cdot 0.5\text{bpac}$ .



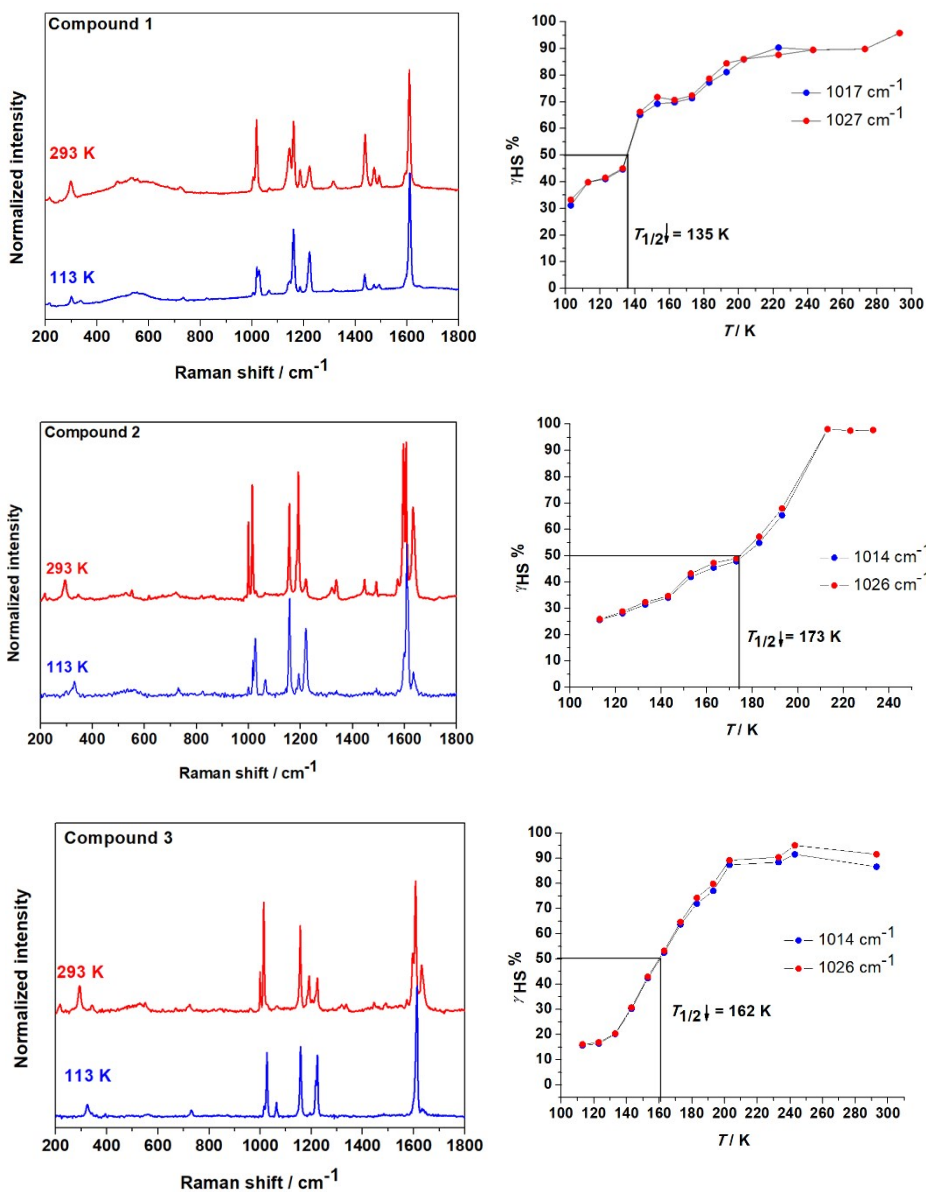

**SI-16. Left:** 532 nm Raman spectra of **1-3** recorded at 293 K (HS) and 113 K (LS). **Right:** Temperature dependent HS fraction ( $\gamma_{\text{HS}}$ ) of **1-3** obtained by integration of Raman peak areas in the cooling mode. Data were collected every 10 K between 113 and 293 K.

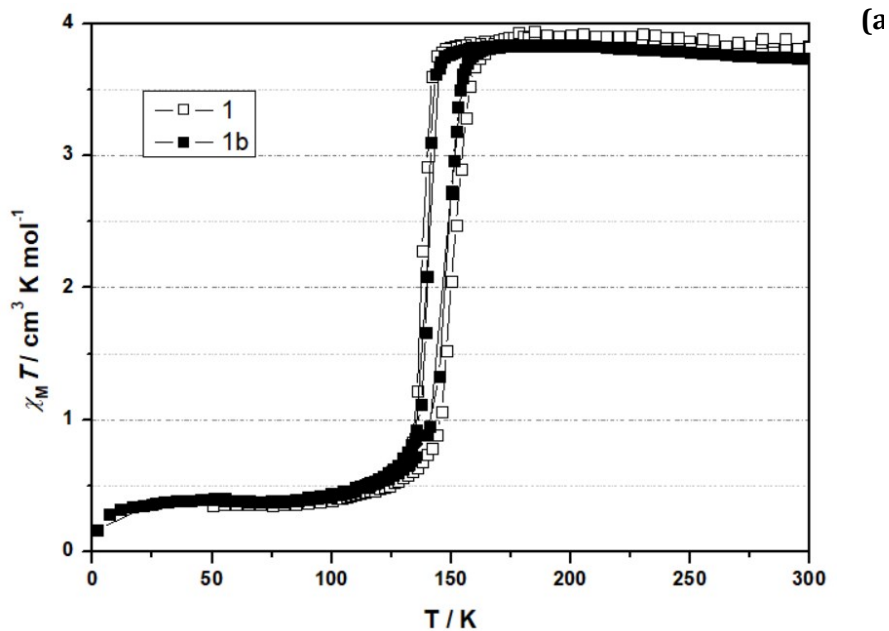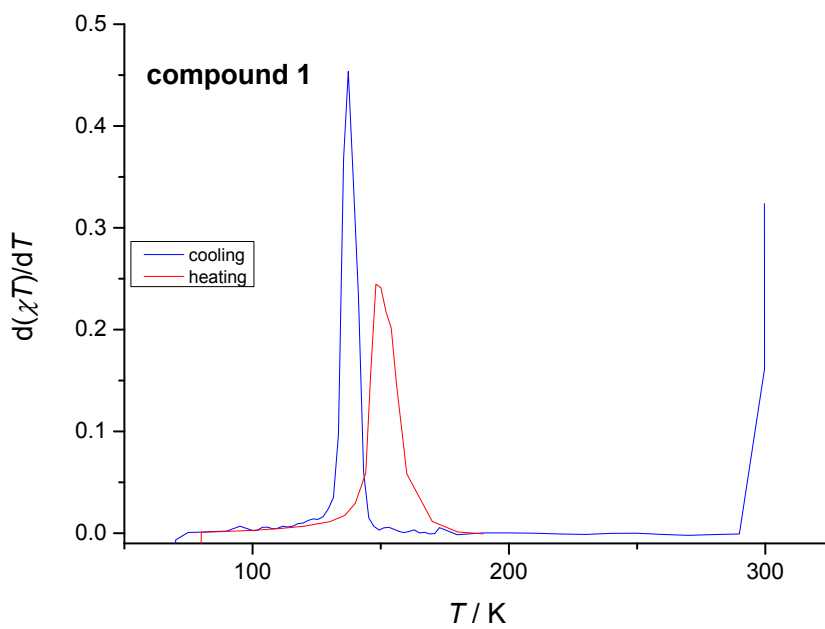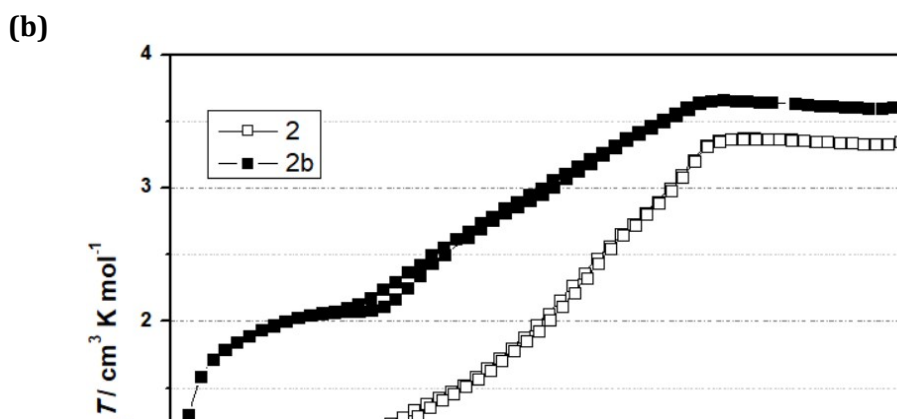

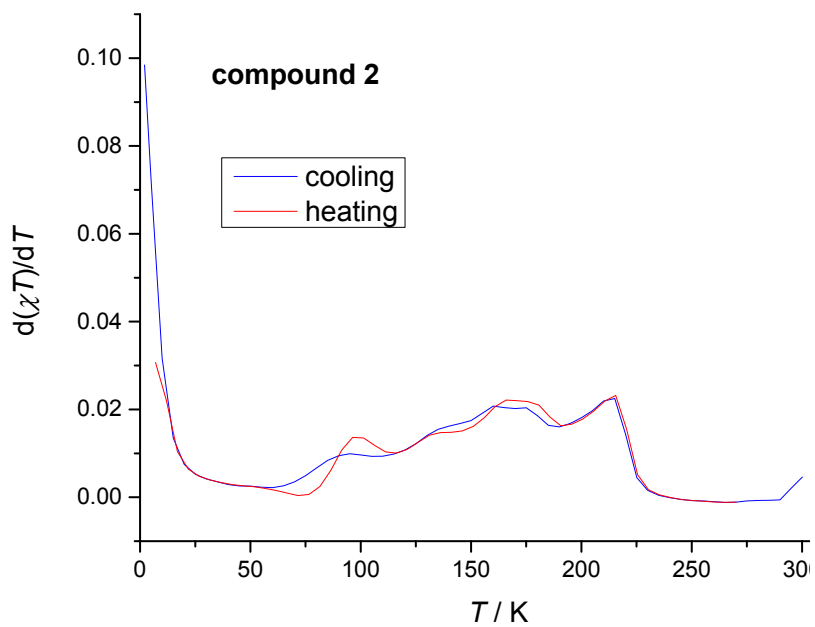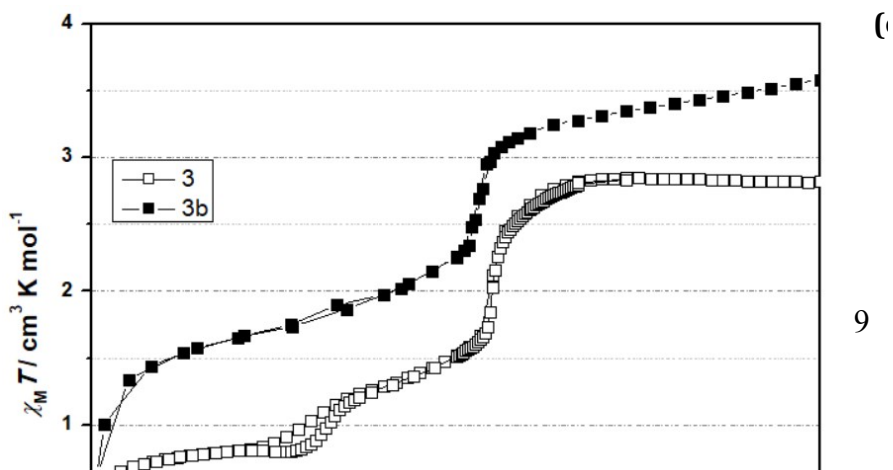

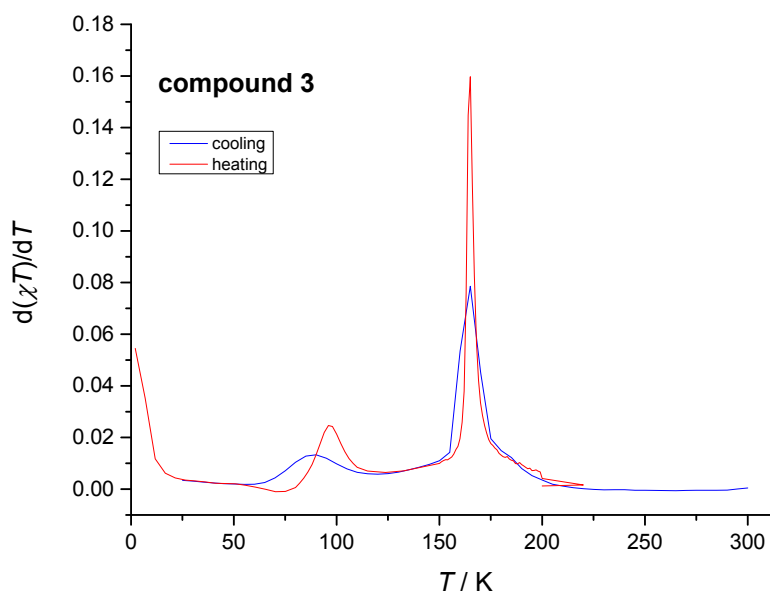

SI-17. Comparison of magnetic measurements on (a) 1 and 1b, (b) 2 and 2b, (c) 3 and 3b.

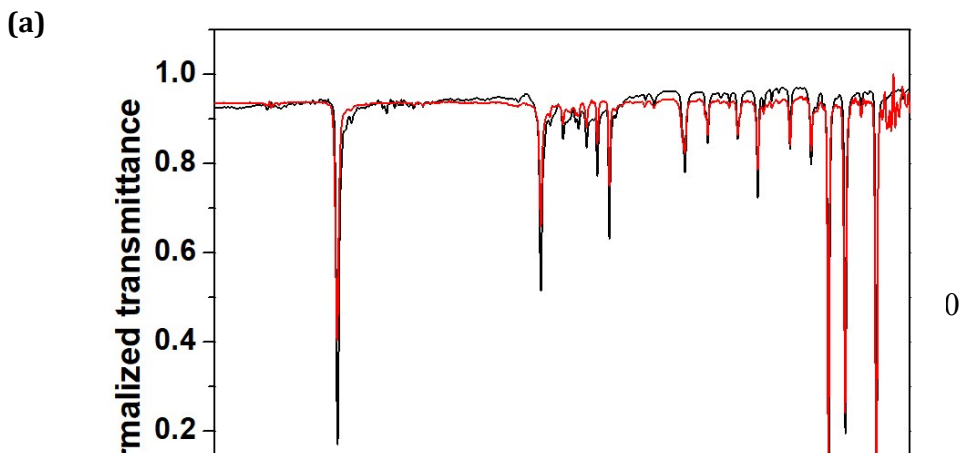

(b)

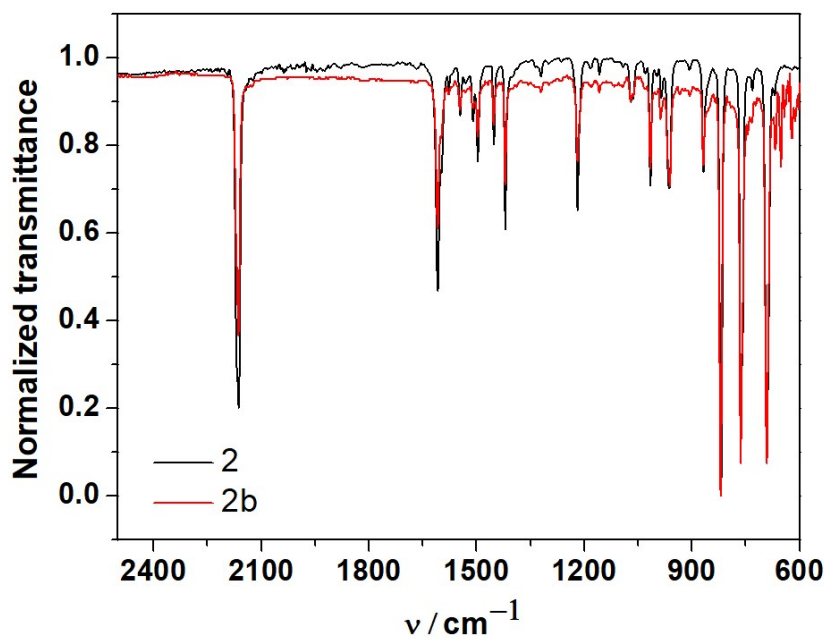

(c)

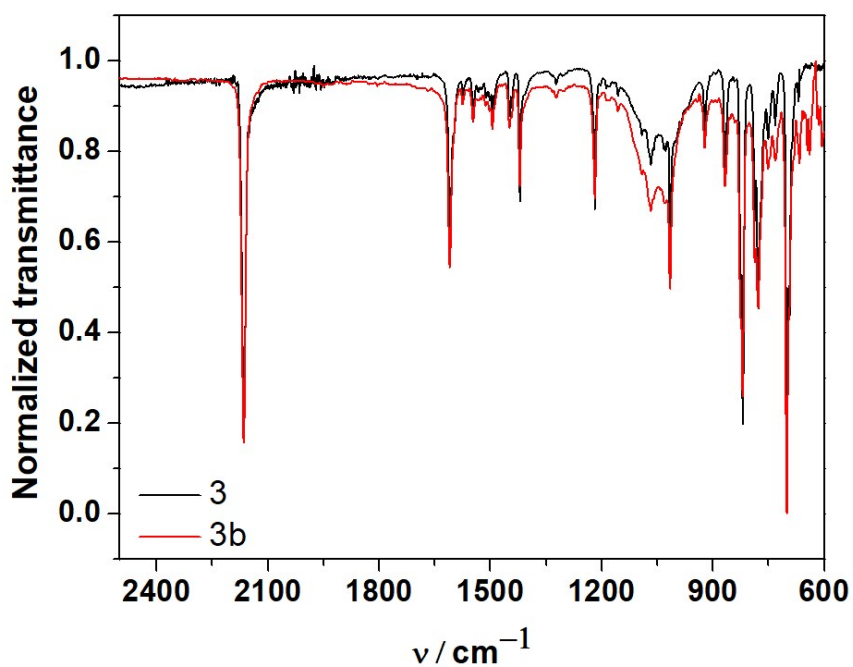

SI-18. FTIR spectra of (a) 1 vs. 1b, (b) 2 vs. 2b and (c) 3 vs. 3b.

(a)

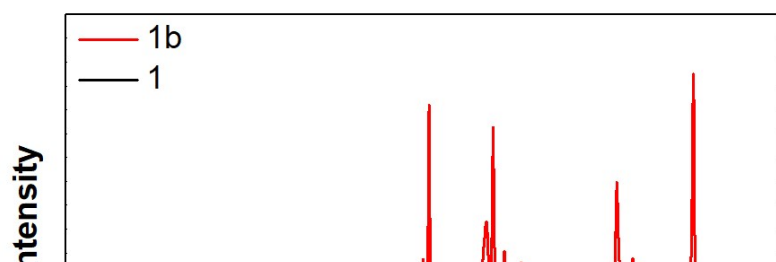

(b)

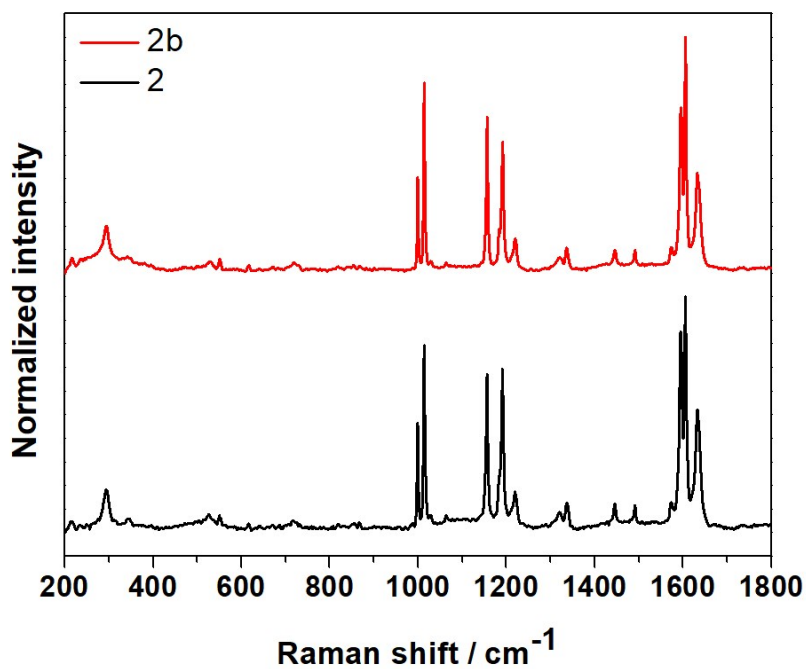

(c)

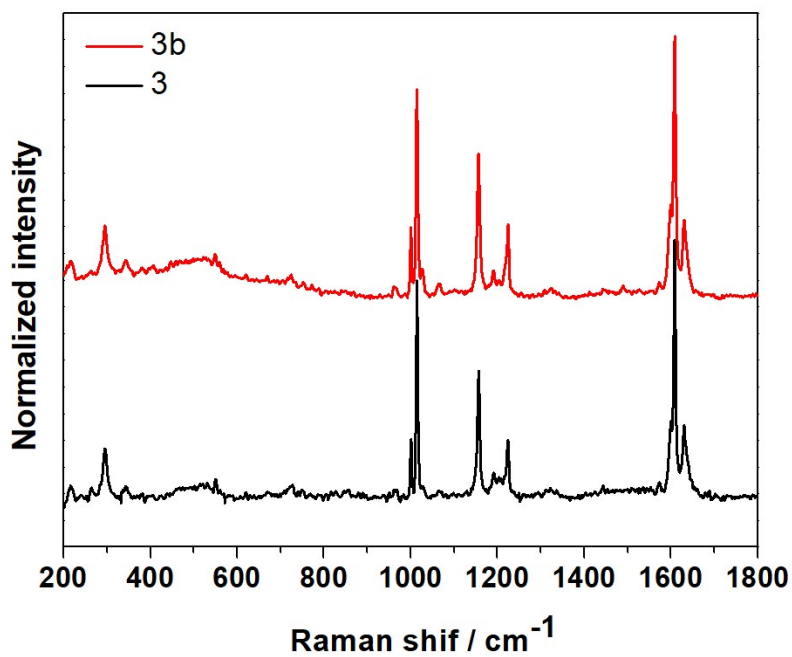

SI-19. 532 nm Raman spectra of (a) 1 vs. 1b, (b) 2 vs. 2b and (c) 3 vs. 3b at 293 K.

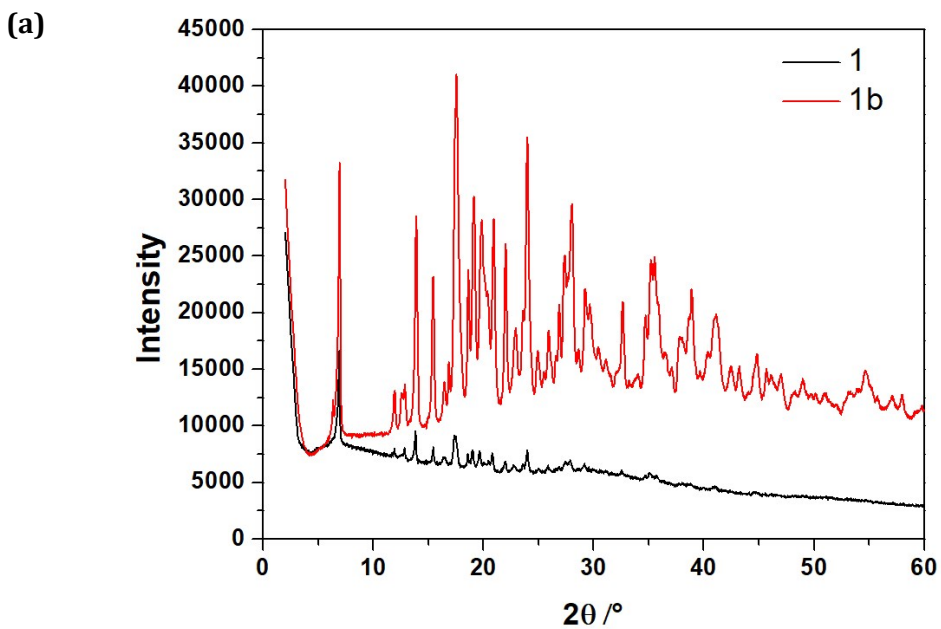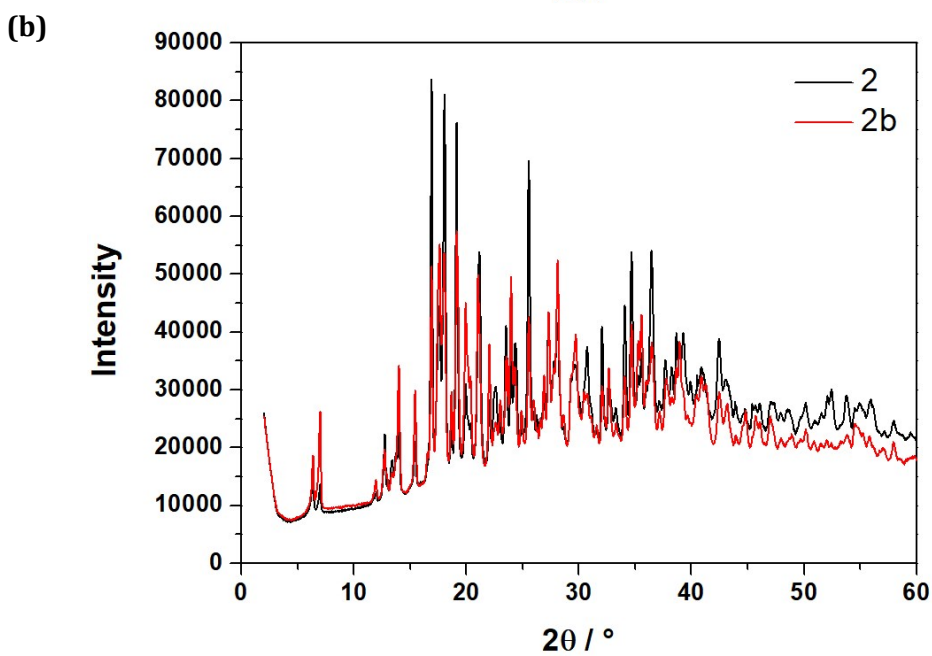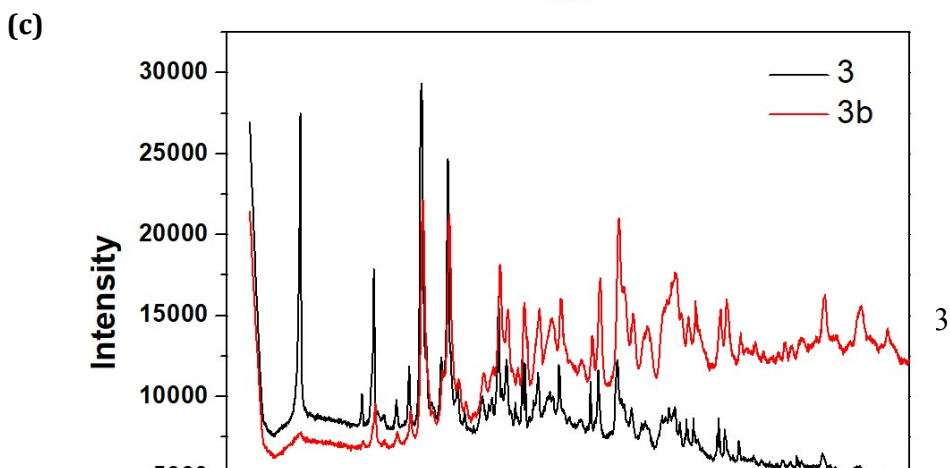

SI-20. Powder X-ray diffractograms of (a) **1** vs. **1b**, (b) **2** vs. **2b** and (c) **3** vs. **3b**.

(a)

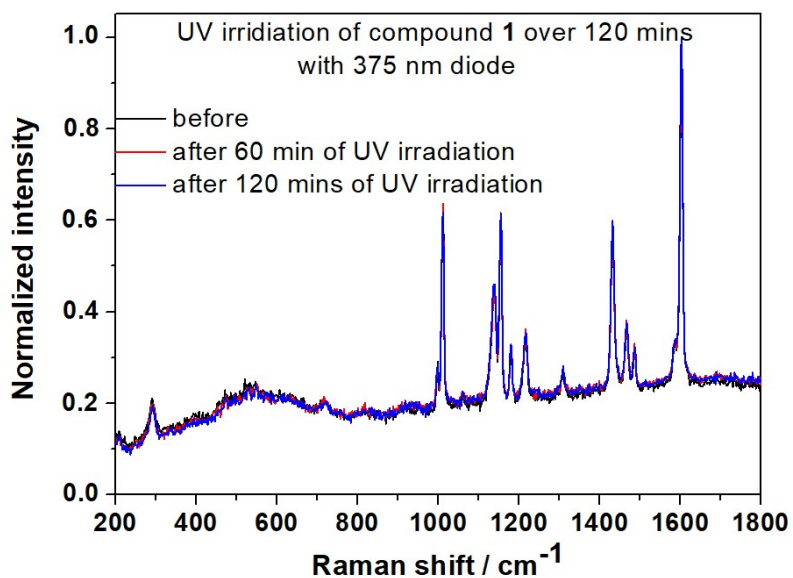

(b)

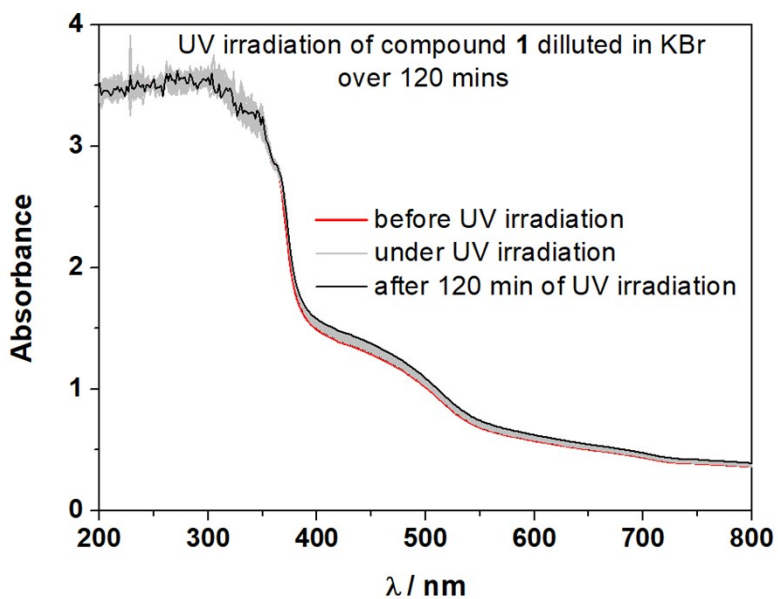



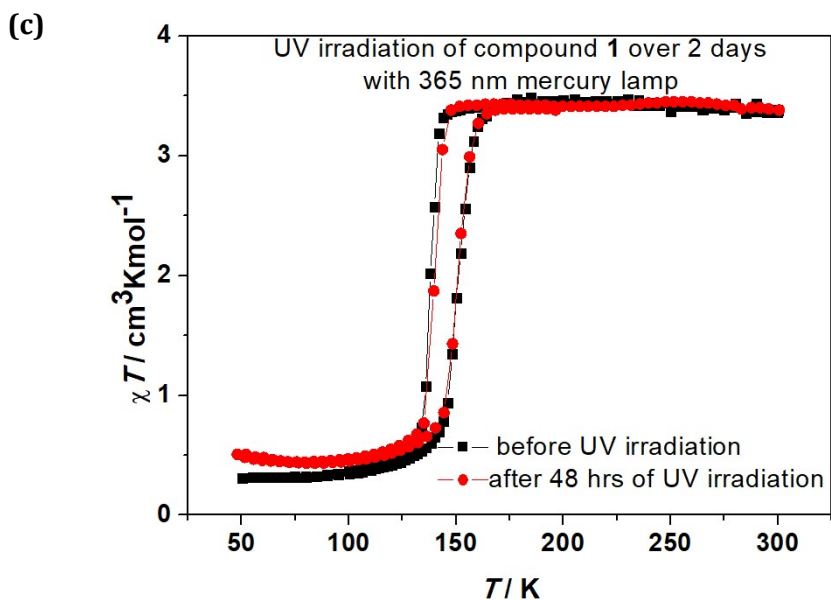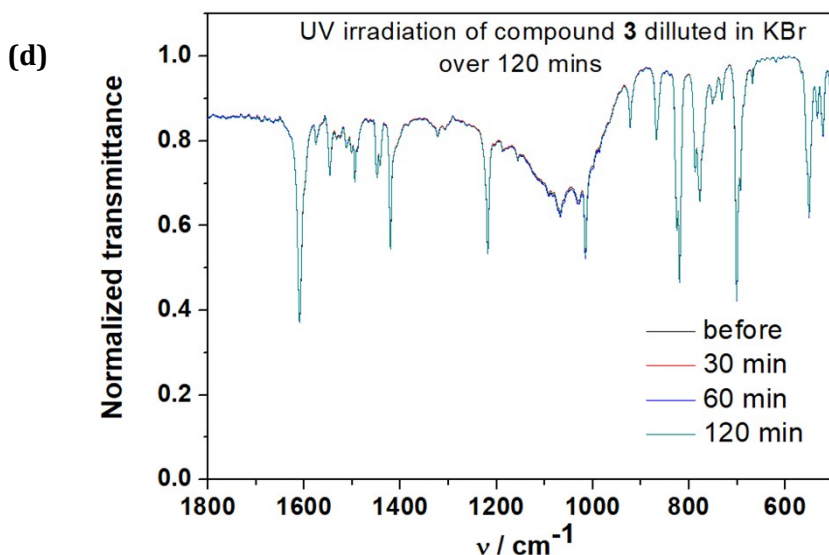

**SI-21.** UV irradiation experiments with compounds **1** and **3** using different light sources and detection methods: **(a)** Raman spectra of compound **1** collected every 60 min after irradiation by a 375 nm diode; **(b)** UV-VIS measurements of compound **1**: data collected every minute over 120 min under continuous UV irradiation (150 W Xenon light source with UV bandpass filter); **(c)** Magnetic measurements on compound **1** before and after 2 days UV irradiation (mercury lamp, 365 nm); **(d)** FTIR measurements on a KBr pellet of compound **3** over 120 min UV irradiation (150 W xenon light source with UV bandpass filter).

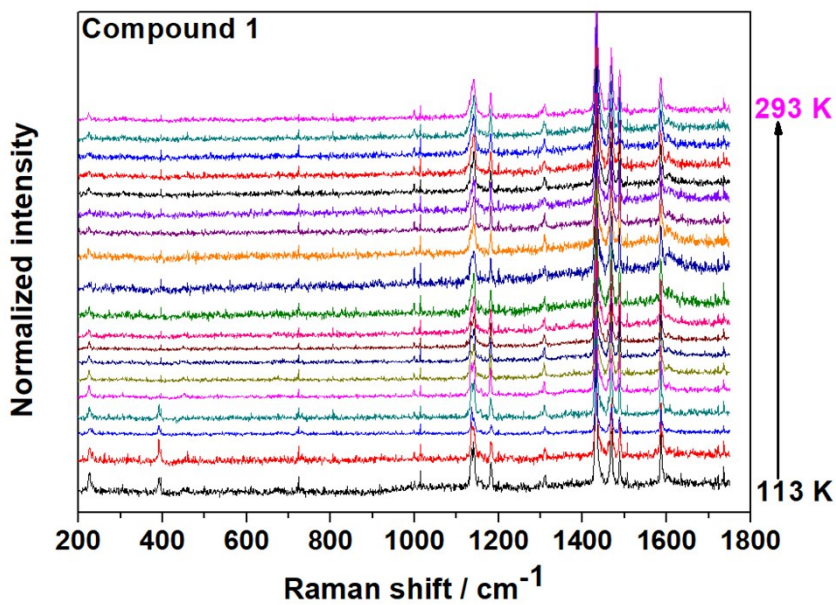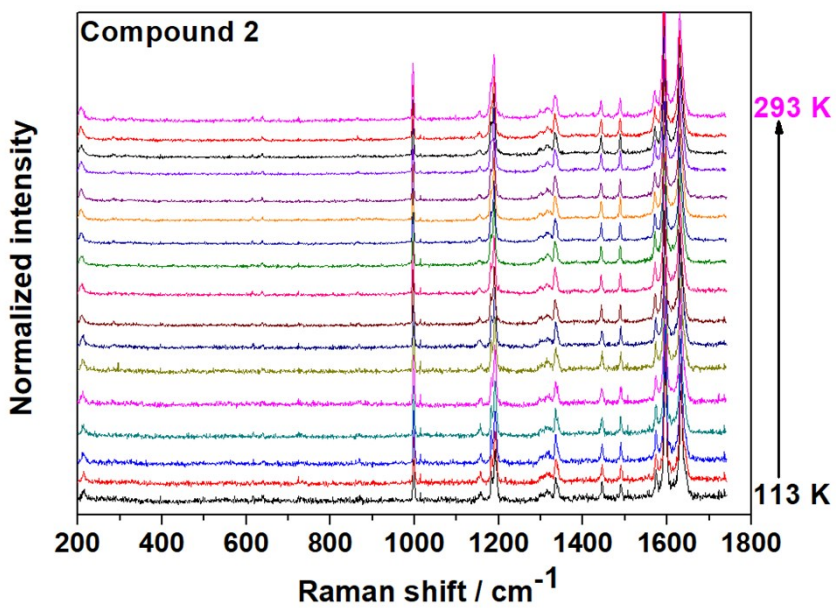

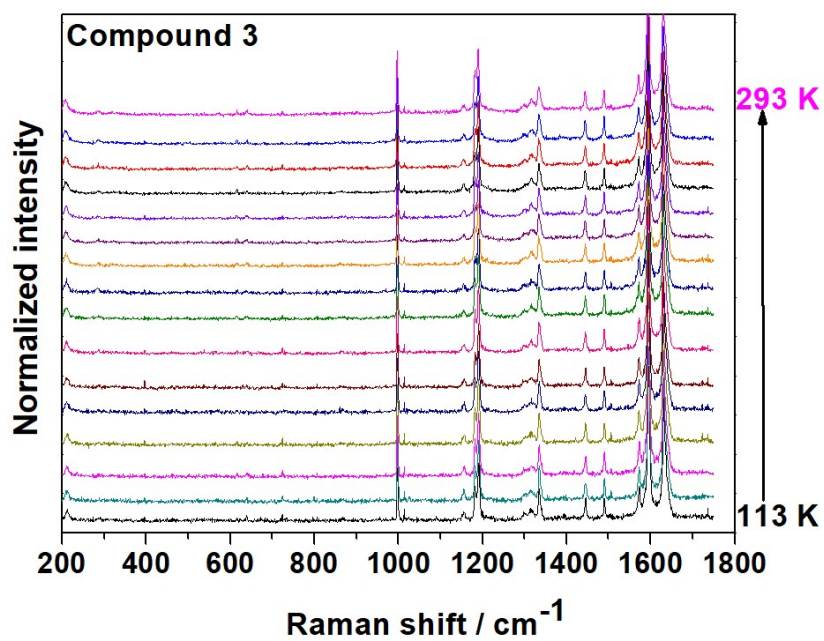

SI-22. Variable temperature 355 nm Raman spectra collected for compounds 1-3.

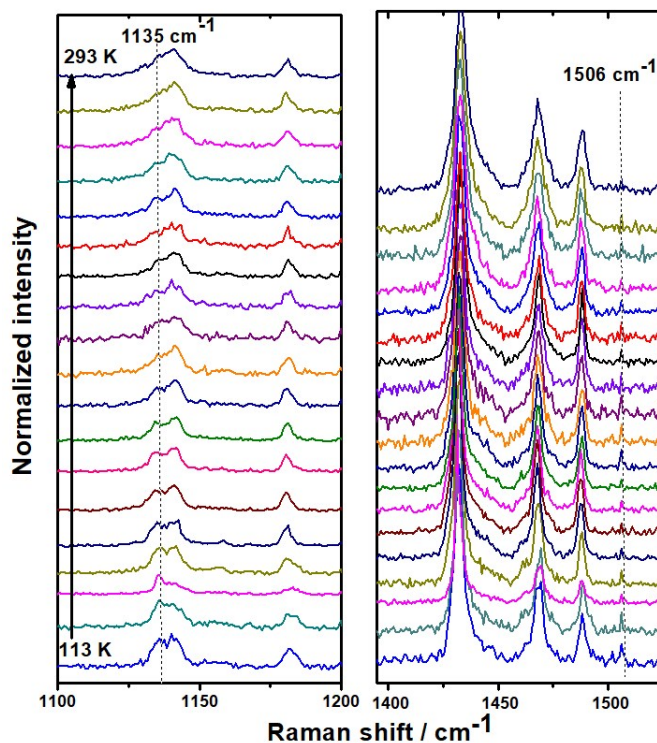

**SI-23.** Temperature dependent Raman spectra (355 nm laser source) of compound **1**. Normalized intensity for two selected regions around 1135 (left) and 1506  $\text{cm}^{-1}$  (right).

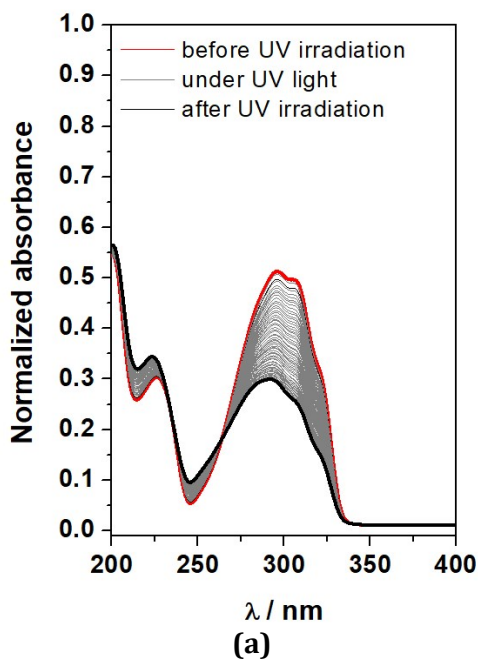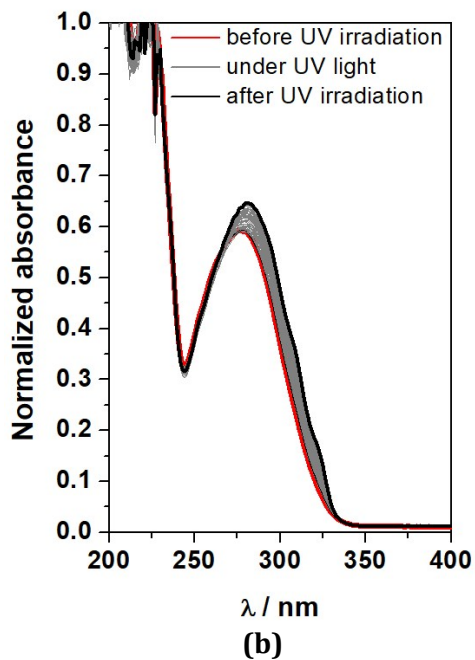

**SI-24.** UV-VIS spectra of **(a)** *trans*-stilbene and **(b)** *cis*-stilbene in ethanol before, under and after UV light irradiation (150 W xenon lamp with UV bandpass filter). Data were collected every 15 seconds for 1 hour.

**SI-25.** Well-distinguishable peaks present in the room-temperature Raman spectra associated with *cis* and *trans*- stilbene measured using different laser sources (355, 532, 785 nm). (N.B. The luminescence of *trans*-stilbene under 355 nm irradiation hides Raman peaks.)

| <i>trans</i> -stilbene |      | <i>cis</i> -stilbene |      |      |
|------------------------|------|----------------------|------|------|
| 532                    | 785  | 355                  | 532  | 785  |
| 1637                   | 1639 | 1638                 | 1629 | 1627 |
| 1591                   | 1592 | 1597                 | 1599 | 1598 |
| 1571                   | 1571 | 1576                 | 1573 | 1572 |
| 1489                   | 1490 | 1492                 | 1491 |      |
| 1443                   | 1445 | 1447                 | 1444 |      |
| 1337                   | 1338 | 1336                 |      |      |
| 1325                   | 1327 | 1322                 | 1321 | 1321 |
| 1289                   | 1290 |                      | 1308 | 1305 |
|                        |      | 1237                 | 1234 | 1232 |
| 1191                   | 1192 | 1192                 | 1204 | 1203 |
| 1179                   | 1181 | 1182                 | 1182 | 1181 |
| 1154                   | 1161 | 1156                 |      |      |
|                        |      | 1148                 | 1149 | 1149 |
|                        |      |                      | 1100 |      |
| 1024                   | 1026 |                      | 1029 | 1029 |
| 995                    | 997  | 1000                 | 1001 | 1001 |
| 981                    | 984  |                      |      |      |
|                        |      | 963                  | 966  | 968  |
|                        |      | 917                  |      |      |
| 863                    | 867  |                      |      | 845  |
| 851                    | 855  |                      |      | 770  |
| 839                    | 842  |                      |      |      |
|                        |      |                      | 752  | 752  |
| 638                    | 640  | 641                  |      |      |
| 614                    | 618  | 618                  | 619  | 620  |
|                        |      | 561                  | 561  | 562  |
|                        |      |                      |      | 521  |
|                        | 409  | 401                  | 404  | 405  |
| 286                    | 292  |                      | 262  | 260  |
| 229                    | 233  |                      |      |      |
